# Supplementary material for: Revealing the gut bacteriome of Dendroctonus bark beetles (Curculionidae: Scolytinae): diversity, core members and co-evolutionary patterns
Source: PubMed Central journal article supplement (PMC5655642; doi:10.1038/s41598-017-14031-6), 2017-10-24
Supplement: 41598_2017_14031_MOESM1_ESM.pdf [file 41598_2017_14031_MOESM1_ESM.pdf]

**Revealing the gut bacteriome of *Dendroctonus* bark beetles (Curculionidae: Scolytinae): diversity, core members and co-evolutionary patterns.**

Juan Alfredo Hernández-García<sup>1</sup>, Carlos Iván Briones-Roblero<sup>1</sup>, Flor N. Rivera-Orduña<sup>\*2</sup>, and Gerardo Zúñiga<sup>\*1</sup>.

<sup>1</sup>Laboratorio de Variación Biológica y Evolución. Departamento de Zoología, Escuela Nacional de Ciencias Biológicas, Instituto Politécnico Nacional. Prolongación de Carpio y Plan de Ayala s/n. Delegación Miguel Hidalgo. CP11340. México D. F.

<sup>2</sup>Laboratorio de Ecología Microbiana. Departamento de Microbiología, Escuela Nacional de Ciencias Biológicas, Instituto Politécnico Nacional. Prolongación de Carpio y Plan de Ayala s/n. Delegación Miguel Hidalgo. CP11340. México D. F.

**Short title:** Gut bacterial communities of *Dendroctonus*

\*Corresponding authors:

Flor Nohemí Rivera-Orduña: email: flor\_1413@hotmail.com

Gerardo Zúñiga: email: capotezu@hotmail.com

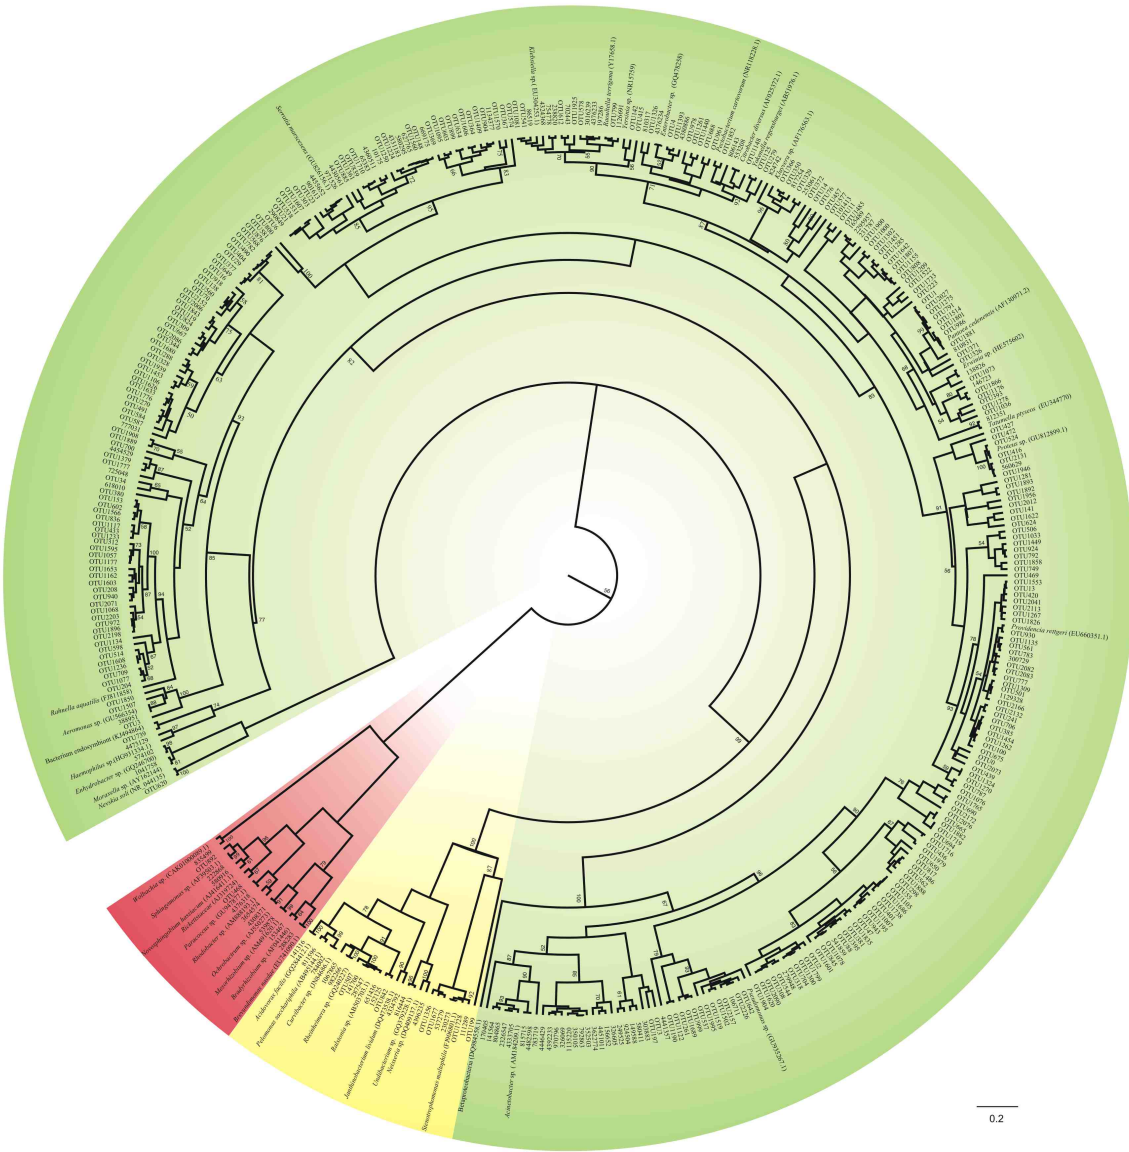

● Alphaproteobacteria    ● Betaproteobacteria    ● Gammaproteobacteria

**Supplementary material Figure 1.** Maximum likelihood phylogeny of the 16S rRNA sequences of the gut bacterial communities of *Dendroctonus* species analysed. Numbers at the nodes are bootstrap values >0.5. Phylogeny sections are colour-code according to bacterial classes; it shows all OTU found belonging to the Proteobacteria Phylum.
