# Supplementary material for: Revealing the gut bacteriome of Dendroctonus bark beetles (Curculionidae: Scolytinae): diversity, core members and co-evolutionary patterns
Source: PubMed Central journal article supplement (PMC5655642; doi:10.1038/s41598-017-14031-6), 2017-10-24
Supplement: 41598_2017_14031_MOESM3_ESM.pdf [file 41598_2017_14031_MOESM3_ESM.pdf]

**Revealing the gut bacteriome of *Dendroctonus* bark beetles (Curculionidae: Scolytinae): diversity, core members and co-evolutionary patterns.**

Juan Alfredo Hernández-García<sup>1</sup>, Carlos Iván Briones-Roblero<sup>1</sup>, Flor N. Rivera-Orduña\*<sup>2</sup>, and Gerardo Zúñiga\*<sup>1</sup>.

<sup>1</sup> Laboratorio de Variación Biológica y Evolución. Departamento de Zoología, Escuela Nacional de Ciencias Biológicas, Instituto Politécnico Nacional. Prolongación de Carpio y Plan de Ayala s/n. Delegación Miguel Hidalgo. CP11340. México D. F., México

<sup>2</sup>Laboratorio de Ecología Microbiana. Departamento de Microbiología, Escuela Nacional de Ciencias Biológicas, Instituto Politécnico Nacional. Prolongación de Carpio y Plan de Ayala s/n. Delegación Miguel Hidalgo. CP11340. México, D. F., México.

**Short title:** Gut bacterial communities of *Dendroctonus*

\*Corresponding authors:

Flor Nohemí Rivera-Orduña: email: flor\_1413@hotmail.com

Gerardo Zúñiga: email: capotezu@hotmail.com

Table S1. Alpha-diversity estimation of gut bacterial communities of different *Dendroctonus* species.

| Label                      | Observed OTU <sup>97***</sup> | Richness and Diversity index |         |      |                       | Good's coverage |
|----------------------------|-------------------------------|------------------------------|---------|------|-----------------------|-----------------|
|                            |                               | Chao1                        | ACE**** | PD** | Simpson <sup>-1</sup> |                 |
| <i>D. adjunctus</i>        | 63                            | 131.0                        | 134     | 4.7  | 4                     | 0.938           |
| <i>D. approximatus</i> *   | 30                            | 68.0                         | 80      | 1.4  | 1                     | 0.967           |
| <i>D. brevicomis</i>       | 99                            | 238.1                        | 295     | 3.9  | 9                     | 0.894           |
| <i>D. frontalis</i>        | 41                            | 126.1                        | 112     | 2.2  | 2                     | 0.957           |
| <i>D. mesoamericanus</i>   | 49                            | 205.6                        | 174     | 3.3  | 4                     | 0.950           |
| <i>D. jeffreyi</i>         | 98                            | 193.3                        | 210     | 6.8  | 8                     | 0.908           |
| <i>D. mexicanus</i>        | 61                            | 151.1                        | 159     | 3.8  | 6                     | 0.940           |
| <i>D. parallellocollis</i> | 41                            | 82.9                         | 80      | 3.0  | 3                     | 0.963           |
| <i>D. ponderosae</i>       | 46                            | 89.0                         | 100     | 3.3  | 5                     | 0.959           |
| <i>D. pseudotsugae</i> *   | 25                            | 28.7                         | 25      | 0.4  | 2                     | 0.977           |
| <i>D. rhizophagus</i>      | 57                            | 185.6                        | 192     | 3.1  | 6                     | 0.937           |
| <i>D. valens</i>           | 87.5                          | 293.0                        | 257     | 4.2  | 9                     | 0.905           |
| <i>D. vitei</i>            | 61                            | 167.1                        | 206     | 3.4  | 6                     | 0.933           |

\*These samples have not replicates

\*\*Phylogenetic diversity

\*\*\*Operational Taxonomic Units at 97% of similarity

\*\*\*\*Abundance-based in coverage estimator
